# Supplementary material
Source: publisher figshare collection journal article supplement (https://acs.figshare.com/ndownloader/files/4090480)
Supplement: Supplementary file 1 [file 4090480]

 
data_shelxl
 
_audit_creation_method            SHELXL-97
_chemical_name_systematic
;
 ?
;
_chemical_name_common             ?
_chemical_melting_point           ?
_chemical_formula_moiety          'C15 H20 O2'
_chemical_formula_sum             'C15 H20 O2'
_chemical_formula_weight          232.31
 
loop_
 _atom_type_symbol
 _atom_type_description
 _atom_type_scat_dispersion_real
 _atom_type_scat_dispersion_imag
 _atom_type_scat_source
 'C'  'C'   0.0181   0.0091
 'International Tables Vol C Tables 4.2.6.8 and 6.1.1.4'
 'H'  'H'   0.0000   0.0000
 'International Tables Vol C Tables 4.2.6.8 and 6.1.1.4'
 'O'  'O'   0.0492   0.0322
 'International Tables Vol C Tables 4.2.6.8 and 6.1.1.4'
 
_symmetry_cell_setting                  orthorhombic
_symmetry_space_group_name_H-M         'P b c a'
_symmetry_space_group_name_Hall        '-P 2ac 2ab'
 
loop_
 _symmetry_equiv_pos_as_xyz
 'x, y, z'
 '-x+1/2, y+1/2, z'
 'x, -y+1/2, z+1/2'
 '-x+1/2, -y, z+1/2'
 '-x, -y, -z'
 'x-1/2, -y-1/2, -z'
 '-x, y-1/2, -z-1/2'
 'x-1/2, y, -z-1/2'
 
_cell_length_a                    13.4787(2)
_cell_length_b                    13.3407(2)
_cell_length_c                    14.2140(10)
_cell_angle_alpha                 90.00
_cell_angle_beta                  90.00
_cell_angle_gamma                 90.00
_cell_volume                      2555.89(19)
_cell_formula_units_Z             8
_cell_measurement_temperature     293(2)
_cell_measurement_reflns_used     15279
_cell_measurement_theta_min       6.60
_cell_measurement_theta_max       68.30
 
_exptl_crystal_description        prism
_exptl_crystal_colour             colorless
_exptl_crystal_size_max           0.20
_exptl_crystal_size_mid           0.20
_exptl_crystal_size_min           0.10
_exptl_crystal_density_meas       ?
_exptl_crystal_density_diffrn     1.207
_exptl_crystal_density_method     'not measured'
_exptl_crystal_F_000              1008
_exptl_absorpt_coefficient_mu     0.616
_exptl_absorpt_correction_type    multi-scan
_exptl_absorpt_correction_T_min   0.8866
_exptl_absorpt_correction_T_max   0.9409
_exptl_absorpt_process_details    'Jacobson, R. (1998) Private communication'
 
_exptl_special_details
;
 ?
;
 
_diffrn_ambient_temperature       293(2)
_diffrn_radiation_wavelength      1.54187
_diffrn_radiation_type            CuK\a
_diffrn_radiation_source          'fine-focus sealed tube'
_diffrn_radiation_monochromator   graphite
_diffrn_measurement_device_type   'Rigaku Saturn944+ CCD'
_diffrn_measurement_method        \w
_diffrn_detector_area_resol_mean  ?
_diffrn_standards_number          ?
_diffrn_standards_interval_count  ?
_diffrn_standards_interval_time   ?
_diffrn_standards_decay_%         ?
_diffrn_reflns_number             18389
_diffrn_reflns_av_R_equivalents   0.0293
_diffrn_reflns_av_sigmaI/netI     0.0204
_diffrn_reflns_limit_h_min        -13
_diffrn_reflns_limit_h_max        16
_diffrn_reflns_limit_k_min        -14
_diffrn_reflns_limit_k_max        15
_diffrn_reflns_limit_l_min        -16
_diffrn_reflns_limit_l_max        17
_diffrn_reflns_theta_min          6.57
_diffrn_reflns_theta_max          68.32
_reflns_number_total              2323
_reflns_number_gt                 1917
_reflns_threshold_expression      >2\s(I)
 
_computing_data_collection
                                   'CrystalClear-SM Auto 2.0 r4 (Rigaku, 2009)'
_computing_cell_refinement             'CrystalClear-SM Auto 2.0 r4'
_computing_data_reduction              'CrystalClear-SM Auto 2.0 r4'
_computing_structure_solution          'SHELXS97 (Sheldrick, 1997)'
_computing_structure_refinement        'SHELXL97 (Sheldrick, 1997)'
_computing_publication_material        'CrystalStructure 4.0 (Rigaku, 2009)'
_computing_molecular_graphics          'CrystalStructure 4.0'
 
_refine_special_details
;
 Refinement of F^2^ against ALL reflections.  The weighted R-factor wR and
 goodness of fit S are based on F^2^, conventional R-factors R are based
 on F, with F set to zero for negative F^2^. The threshold expression of
 F^2^ > 2\s(F^2^) is used only for calculating R-factors(gt) etc. and is
 not relevant to the choice of reflections for refinement.  R-factors based
 on F^2^ are statistically about twice as large as those based on F, and R-
 factors based on ALL data will be even larger.
;
 
_refine_ls_structure_factor_coef  Fsqd
_refine_ls_matrix_type            full
_refine_ls_weighting_scheme       calc
_refine_ls_weighting_details
 'calc w=1/[\s^2^(Fo^2^)+(0.0693P)^2^+0.4180P] where P=(Fo^2^+2Fc^2^)/3'
_atom_sites_solution_primary      direct
_atom_sites_solution_secondary    difmap
_atom_sites_solution_hydrogens    geom
_refine_ls_hydrogen_treatment     constr
_refine_ls_extinction_method      none
_refine_ls_extinction_coef        ?
_refine_ls_number_reflns          2323
_refine_ls_number_parameters      154
_refine_ls_number_restraints      0
_refine_ls_R_factor_all           0.0519
_refine_ls_R_factor_gt            0.0451
_refine_ls_wR_factor_ref          0.1282
_refine_ls_wR_factor_gt           0.1209
_refine_ls_goodness_of_fit_ref    1.093
_refine_ls_restrained_S_all       1.093
_refine_ls_shift/su_max           0.000
_refine_ls_shift/su_mean          0.000
 
loop_
 _atom_site_label
 _atom_site_type_symbol
 _atom_site_fract_x
 _atom_site_fract_y
 _atom_site_fract_z
 _atom_site_U_iso_or_equiv
 _atom_site_adp_type
 _atom_site_occupancy
 _atom_site_symmetry_multiplicity
 _atom_site_calc_flag
 _atom_site_refinement_flags
 _atom_site_disorder_assembly
 _atom_site_disorder_group
O2 O -0.02404(9) 0.83041(10) 0.28061(10) 0.0757(4) Uani 1 1 d . . .
O5 O 0.31719(9) 0.54229(9) 0.12227(9) 0.0735(4) Uani 1 1 d . . .
C1 C 0.08372(10) 0.70967(10) 0.21006(9) 0.0413(3) Uani 1 1 d . . .
C3 C 0.08105(12) 0.65258(12) 0.30449(10) 0.0519(4) Uani 1 1 d . . .
H3A H 0.0622 0.6971 0.3554 0.062 Uiso 1 1 calc R . .
H3B H 0.0340 0.5977 0.3017 0.062 Uiso 1 1 calc R . .
C4 C 0.06024(11) 0.63384(11) 0.13013(10) 0.0493(4) Uani 1 1 d . . .
H4 H -0.0002 0.5991 0.1502 0.059 Uiso 1 1 calc R . .
C6 C 0.01133(11) 0.79761(12) 0.20825(11) 0.0528(4) Uani 1 1 d . . .
C7 C 0.23754(10) 0.78563(12) 0.11422(10) 0.0477(4) Uani 1 1 d . . .
H7A H 0.2281 0.7355 0.0666 0.057 Uiso 1 1 calc R . .
H7B H 0.3071 0.7988 0.1216 0.057 Uiso 1 1 calc R . .
H7C H 0.2042 0.8462 0.0960 0.057 Uiso 1 1 calc R . .
C8 C 0.18455(12) 0.61367(11) 0.31911(9) 0.0495(4) Uani 1 1 d . . .
C9 C 0.21192(12) 0.83011(11) 0.28101(11) 0.0527(4) Uani 1 1 d . . .
H9A H 0.1790 0.8905 0.2617 0.063 Uiso 1 1 calc R . .
H9B H 0.2817 0.8427 0.2872 0.063 Uiso 1 1 calc R . .
H9C H 0.1857 0.8085 0.3404 0.063 Uiso 1 1 calc R . .
C10 C 0.19495(9) 0.74820(10) 0.20721(9) 0.0392(3) Uani 1 1 d . . .
C11 C 0.03445(12) 0.68139(15) 0.03500(11) 0.0643(5) Uani 1 1 d . . .
H11A H 0.0935 0.7115 0.0082 0.077 Uiso 1 1 calc R . .
H11B H 0.0116 0.6297 -0.0078 0.077 Uiso 1 1 calc R . .
C12 C 0.14068(12) 0.55124(11) 0.12312(11) 0.0577(4) Uani 1 1 d . . .
H12A H 0.1179 0.4935 0.1585 0.069 Uiso 1 1 calc R . .
H12B H 0.1458 0.5309 0.0578 0.069 Uiso 1 1 calc R . .
C13 C 0.24301(11) 0.57790(11) 0.15731(11) 0.0504(4) Uani 1 1 d . . .
C14 C -0.01460(12) 0.84157(15) 0.11465(14) 0.0692(5) Uani 1 1 d . . .
H14A H 0.0423 0.8775 0.0899 0.083 Uiso 1 1 calc R . .
H14B H -0.0684 0.8892 0.1223 0.083 Uiso 1 1 calc R . .
C15 C 0.24768(11) 0.65042(10) 0.23842(10) 0.0452(3) Uani 1 1 d . . .
H15 H 0.3162 0.6631 0.2582 0.054 Uiso 1 1 calc R . .
C16 C 0.21788(16) 0.55981(13) 0.39101(12) 0.0679(5) Uani 1 1 d . . .
H16A H 0.1752 0.5422 0.4397 0.082 Uiso 1 1 calc R . .
H16B H 0.2839 0.5397 0.3927 0.082 Uiso 1 1 calc R . .
C17 C -0.04555(12) 0.76084(17) 0.04524(13) 0.0755(6) Uani 1 1 d . . .
H17A H -0.0584 0.7912 -0.0156 0.091 Uiso 1 1 calc R . .
H17B H -0.1065 0.7297 0.0667 0.091 Uiso 1 1 calc R . .
 
loop_
 _atom_site_aniso_label
 _atom_site_aniso_U_11
 _atom_site_aniso_U_22
 _atom_site_aniso_U_33
 _atom_site_aniso_U_23
 _atom_site_aniso_U_13
 _atom_site_aniso_U_12
O2 0.0589(7) 0.0907(9) 0.0775(8) -0.0149(7) 0.0132(6) 0.0210(6)
O5 0.0745(8) 0.0590(7) 0.0871(9) -0.0110(6) 0.0216(7) 0.0143(6)
C1 0.0392(7) 0.0476(7) 0.0371(7) -0.0005(5) 0.0042(5) -0.0042(5)
C3 0.0588(9) 0.0581(9) 0.0389(8) 0.0016(6) 0.0072(6) -0.0096(7)
C4 0.0477(8) 0.0590(9) 0.0412(8) -0.0033(6) 0.0002(6) -0.0128(6)
C6 0.0349(7) 0.0620(9) 0.0615(9) -0.0018(7) 0.0053(7) 0.0011(6)
C7 0.0415(7) 0.0484(8) 0.0531(9) 0.0059(6) 0.0074(6) -0.0022(6)
C8 0.0686(9) 0.0431(7) 0.0369(7) -0.0014(6) -0.0058(7) -0.0044(6)
C9 0.0531(9) 0.0463(8) 0.0588(9) -0.0099(6) -0.0002(7) -0.0037(6)
C10 0.0370(7) 0.0391(7) 0.0415(7) -0.0008(5) 0.0009(5) 0.0004(5)
C11 0.0595(10) 0.0911(12) 0.0422(8) -0.0012(8) -0.0069(7) -0.0112(8)
C12 0.0729(10) 0.0510(8) 0.0493(9) -0.0125(7) 0.0024(8) -0.0053(7)
C13 0.0613(9) 0.0393(7) 0.0506(8) 0.0017(6) 0.0079(7) 0.0058(6)
C14 0.0458(9) 0.0809(12) 0.0808(12) 0.0200(10) 0.0030(8) 0.0124(8)
C15 0.0445(7) 0.0440(7) 0.0470(8) 0.0005(6) -0.0047(6) 0.0027(6)
C16 0.1004(13) 0.0573(10) 0.0462(9) 0.0028(7) -0.0118(9) -0.0018(9)
C17 0.0488(9) 0.1187(16) 0.0591(11) 0.0252(11) -0.0085(8) -0.0004(10)
 
_geom_special_details
;
 All s.u.'s (except the s.u. in the dihedral angle between two l.s. planes)
 are estimated using the full covariance matrix.  The cell s.u.'s are taken
 into account individually in the estimation of s.u.'s in distances, angles
 and torsion angles; correlations between s.u.'s in cell parameters are only
 used when they are defined by crystal symmetry.  An approximate (isotropic)
 treatment of cell s.u.'s is used for estimating s.u.'s involving l.s. planes.
;
 
loop_
 _geom_bond_atom_site_label_1
 _geom_bond_atom_site_label_2
 _geom_bond_distance
 _geom_bond_site_symmetry_2
 _geom_bond_publ_flag
O2 C6 1.2152(19) . ?
O5 C13 1.2139(18) . ?
C1 C6 1.526(2) . ?
C1 C3 1.5437(19) . ?
C1 C4 1.5538(19) . ?
C1 C10 1.5854(18) . ?
C3 C8 1.503(2) . ?
C3 H3A 0.9700 . ?
C3 H3B 0.9700 . ?
C4 C11 1.533(2) . ?
C4 C12 1.549(2) . ?
C4 H4 0.9800 . ?
C6 C14 1.495(2) . ?
C7 C10 1.5251(18) . ?
C7 H7A 0.9600 . ?
C7 H7B 0.9600 . ?
C7 H7C 0.9600 . ?
C8 C16 1.328(2) . ?
C8 C15 1.510(2) . ?
C9 C10 1.5319(19) . ?
C9 H9A 0.9600 . ?
C9 H9B 0.9600 . ?
C9 H9C 0.9600 . ?
C10 C15 1.5504(19) . ?
C11 C17 1.519(3) . ?
C11 H11A 0.9700 . ?
C11 H11B 0.9700 . ?
C12 C13 1.505(2) . ?
C12 H12A 0.9700 . ?
C12 H12B 0.9700 . ?
C13 C15 1.506(2) . ?
C14 C17 1.519(3) . ?
C14 H14A 0.9700 . ?
C14 H14B 0.9700 . ?
C15 H15 0.9800 . ?
C16 H16A 0.9300 . ?
C16 H16B 0.9300 . ?
C17 H17A 0.9700 . ?
C17 H17B 0.9700 . ?
 
loop_
 _geom_angle_atom_site_label_1
 _geom_angle_atom_site_label_2
 _geom_angle_atom_site_label_3
 _geom_angle
 _geom_angle_site_symmetry_1
 _geom_angle_site_symmetry_3
 _geom_angle_publ_flag
C6 C1 C3 112.27(11) . . ?
C6 C1 C4 110.97(11) . . ?
C3 C1 C4 108.05(11) . . ?
C6 C1 C10 110.78(11) . . ?
C3 C1 C10 101.79(10) . . ?
C4 C1 C10 112.65(10) . . ?
C8 C3 C1 105.60(11) . . ?
C8 C3 H3A 110.6 . . ?
C1 C3 H3A 110.6 . . ?
C8 C3 H3B 110.6 . . ?
C1 C3 H3B 110.6 . . ?
H3A C3 H3B 108.8 . . ?
C11 C4 C12 113.34(13) . . ?
C11 C4 C1 114.93(13) . . ?
C12 C4 C1 111.56(11) . . ?
C11 C4 H4 105.3 . . ?
C12 C4 H4 105.3 . . ?
C1 C4 H4 105.3 . . ?
O2 C6 C14 121.34(15) . . ?
O2 C6 C1 120.89(14) . . ?
C14 C6 C1 117.77(13) . . ?
C10 C7 H7A 109.5 . . ?
C10 C7 H7B 109.5 . . ?
H7A C7 H7B 109.5 . . ?
C10 C7 H7C 109.5 . . ?
H7A C7 H7C 109.5 . . ?
H7B C7 H7C 109.5 . . ?
C16 C8 C3 127.41(16) . . ?
C16 C8 C15 124.73(16) . . ?
C3 C8 C15 107.81(11) . . ?
C10 C9 H9A 109.5 . . ?
C10 C9 H9B 109.5 . . ?
H9A C9 H9B 109.5 . . ?
C10 C9 H9C 109.5 . . ?
H9A C9 H9C 109.5 . . ?
H9B C9 H9C 109.5 . . ?
C7 C10 C9 107.68(12) . . ?
C7 C10 C15 110.54(11) . . ?
C9 C10 C15 109.62(11) . . ?
C7 C10 C1 118.97(11) . . ?
C9 C10 C1 110.79(11) . . ?
C15 C10 C1 98.82(10) . . ?
C17 C11 C4 111.41(14) . . ?
C17 C11 H11A 109.3 . . ?
C4 C11 H11A 109.3 . . ?
C17 C11 H11B 109.3 . . ?
C4 C11 H11B 109.3 . . ?
H11A C11 H11B 108.0 . . ?
C13 C12 C4 116.91(12) . . ?
C13 C12 H12A 108.1 . . ?
C4 C12 H12A 108.1 . . ?
C13 C12 H12B 108.1 . . ?
C4 C12 H12B 108.1 . . ?
H12A C12 H12B 107.3 . . ?
O5 C13 C12 122.00(14) . . ?
O5 C13 C15 122.07(14) . . ?
C12 C13 C15 115.93(12) . . ?
C6 C14 C17 111.35(15) . . ?
C6 C14 H14A 109.4 . . ?
C17 C14 H14A 109.4 . . ?
C6 C14 H14B 109.4 . . ?
C17 C14 H14B 109.4 . . ?
H14A C14 H14B 108.0 . . ?
C13 C15 C8 110.44(12) . . ?
C13 C15 C10 107.60(11) . . ?
C8 C15 C10 103.43(11) . . ?
C13 C15 H15 111.7 . . ?
C8 C15 H15 111.7 . . ?
C10 C15 H15 111.7 . . ?
C8 C16 H16A 120.0 . . ?
C8 C16 H16B 120.0 . . ?
H16A C16 H16B 120.0 . . ?
C14 C17 C11 111.22(13) . . ?
C14 C17 H17A 109.4 . . ?
C11 C17 H17A 109.4 . . ?
C14 C17 H17B 109.4 . . ?
C11 C17 H17B 109.4 . . ?
H17A C17 H17B 108.0 . . ?
 
_diffrn_measured_fraction_theta_max    0.992
_diffrn_reflns_theta_full              68.32
_diffrn_measured_fraction_theta_full   0.992
_refine_diff_density_max    0.198
_refine_diff_density_min   -0.182
_refine_diff_density_rms    0.055
